# Supplementary material for: Database Citation in Full Text Biomedical Articles
Source: PLoS One. 2013 May 29;8(5):e63184. doi: 10.1371/journal.pone.0063184 (PMC3667078; doi:10.1371/journal.pone.0063184)
Supplement: File S1 — Journal based analysis of the OA-PMC articles. This file presents distribution of the articles as well as the publisher-annotated articles based on the journals in the OA-PMC set. (XLSX) [file pone.0063184.s001.xlsx]

## Sheet: journals
Distribution of PMC Articles with Annotated Acc Numbers according to Journals: (Top 20 journals only)
Journal Name	# PMC articles with Annotated Acc Numbers in the Open Access set	% PMC articles with Annotated Acc Numbers in the Open Access set
bmc genomics	1135	0.1228
bmc evolutionary biology	737	0.0797
the journal of cell biology	726	0.0785
virology journal	572	0.0619
bmc microbiology	432	0.0467
the journal of experimental medicine	381	0.0412
bmc bioinformatics	350	0.0379
bmc plant biology	326	0.0353
the journal of biological chemistry	319	0.0345
bmc molecular biology	201	0.0217
genome biology	189	0.0204
bmc structural biology	185	0.02
bmc research notes	183	0.0198
bmc cancer	148	0.016
retrovirology	135	0.0146
bmc genetics	135	0.0146
bmc developmental biology	122	0.0132
bmc biology	121	0.0131
the journal of general physiology	120	0.013
bmc biotechnology	120	0.013
Explanation: Above is the list of top 20 journals which deliver annotated accession numbers. This analysis shows that the leading publisher which provides annotated accession numbers is BMC.
Distribution of PMC articles in the open access set according to Journals: (Top 20 journals only)
Journal Name	# PMC articles in the Open Access set	% of PMC articles in the Open Access set
plos one	42887	0.1045
acta crystallographica section e: structure reports online	18947	0.0462
british journal of cancer	11237	0.0274
nucleic acids research	9247	0.0225
the journal of cell biology	9130	0.0222
environmental health perspectives	8946	0.0218
critical care	7307	0.0178
the journal of experimental medicine	5756	0.014
emerging infectious diseases	5429	0.0132
bmc bioinformatics	5140	0.0125
bmc genomics	4337	0.0106
bmc public health	4151	0.0101
bmc cancer	3215	0.0078
plos biology	3030	0.0074
arthritis research & therapy	2910	0.0071
plos genetics	2842	0.0069
medical history	2761	0.0067
genome biology	2702	0.0066
plos pathogens	2622	0.0064
retrovirology	2425	0.0059
Explanation: Above is the list of top 20 journals which provide open access articles. This analysis shows that some journals contributing to the open access set significantly do not deliver annotated accession numbers (e.g. Plos One)
